# Supplementary figures and images for: HPV Infection Leaves a DNA Methylation Signature in Oropharyngeal Cancer Affecting Both Coding Genes and Transposable Elements
Source: MDPI journal article supplement (doi:10.3390/cancers13143621), 2021-07-20

# CCNL1 status

Strata AMP no alterations

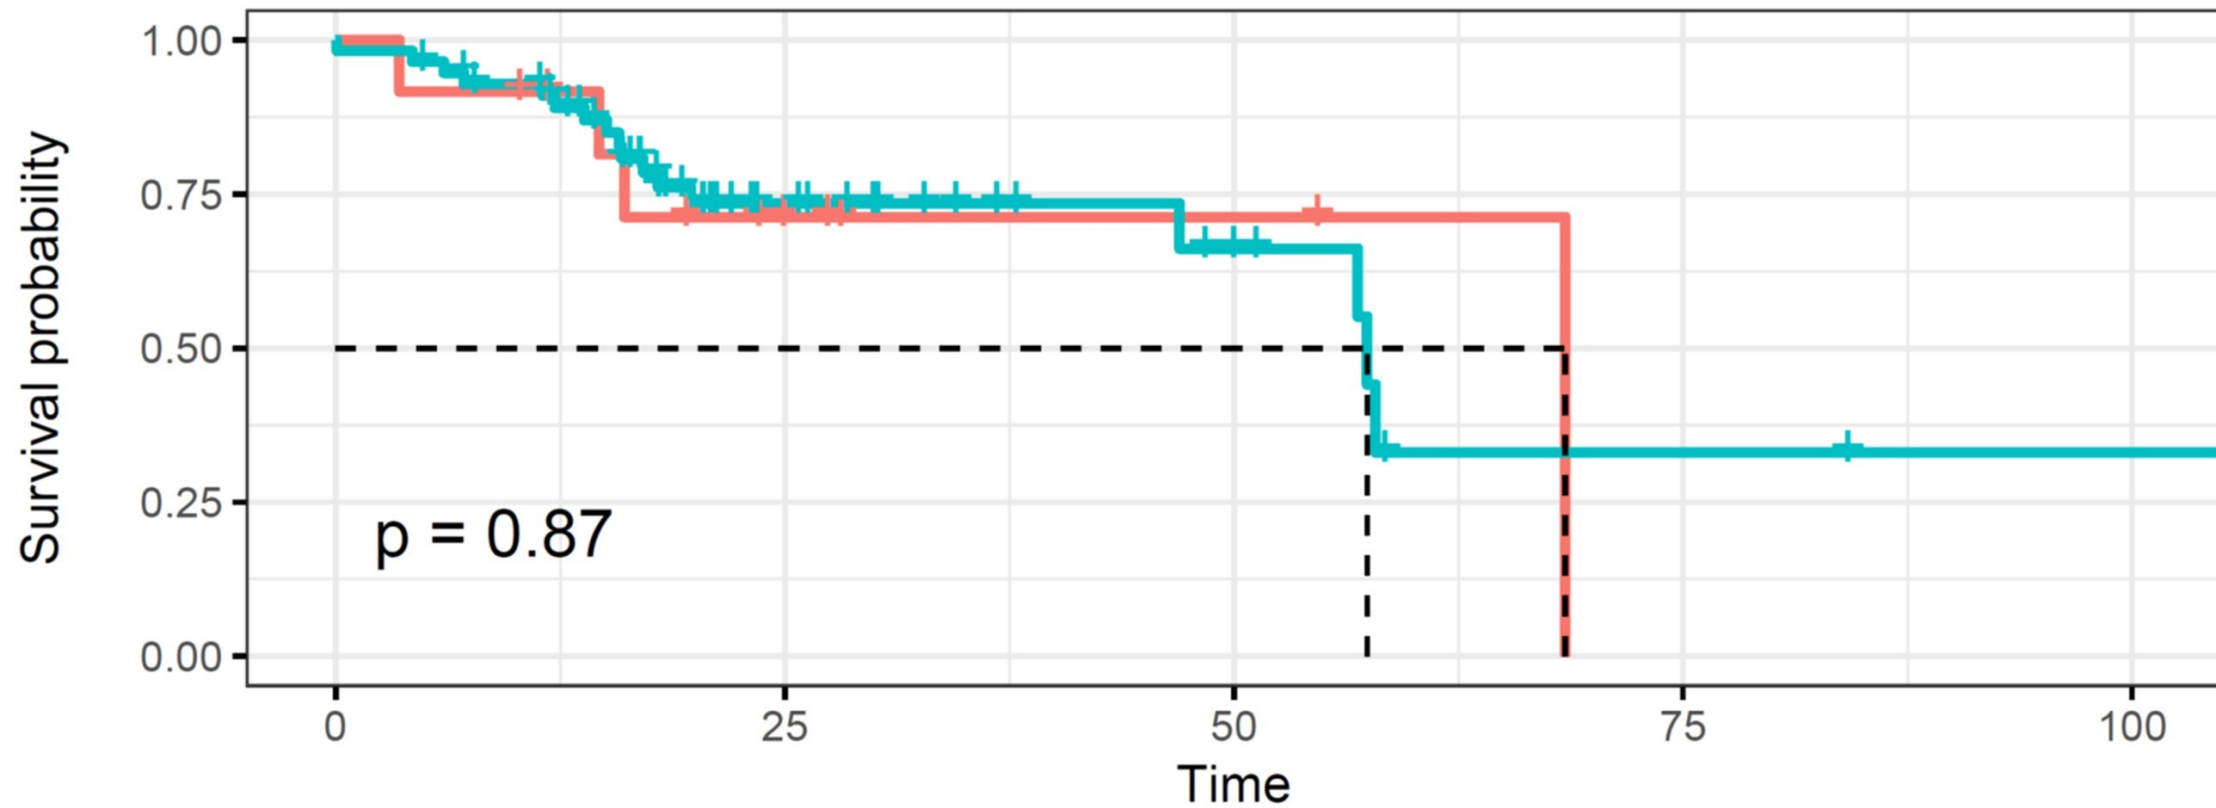

## Number at risk

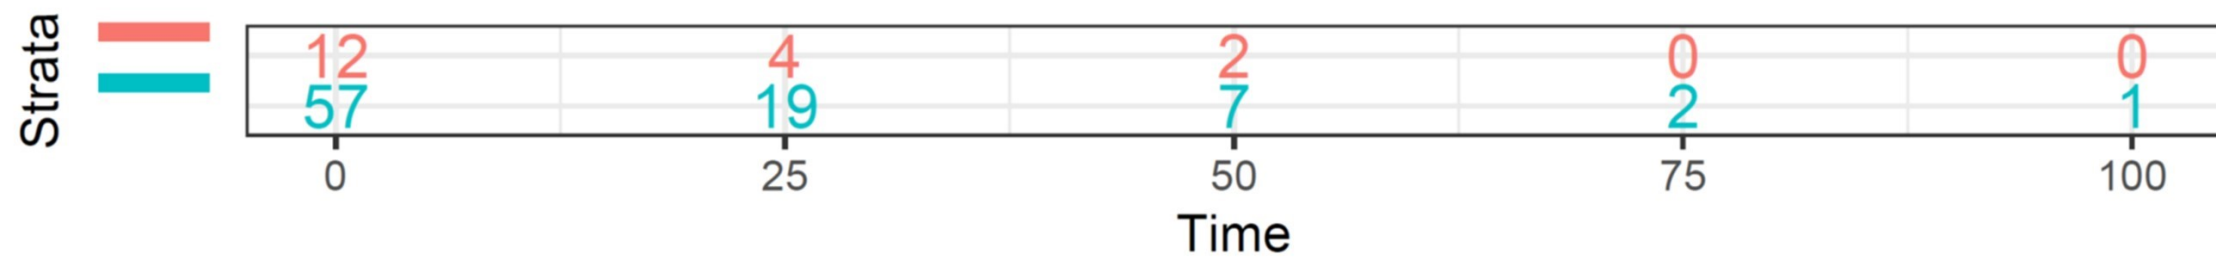

Supplement: s1 [file s1]

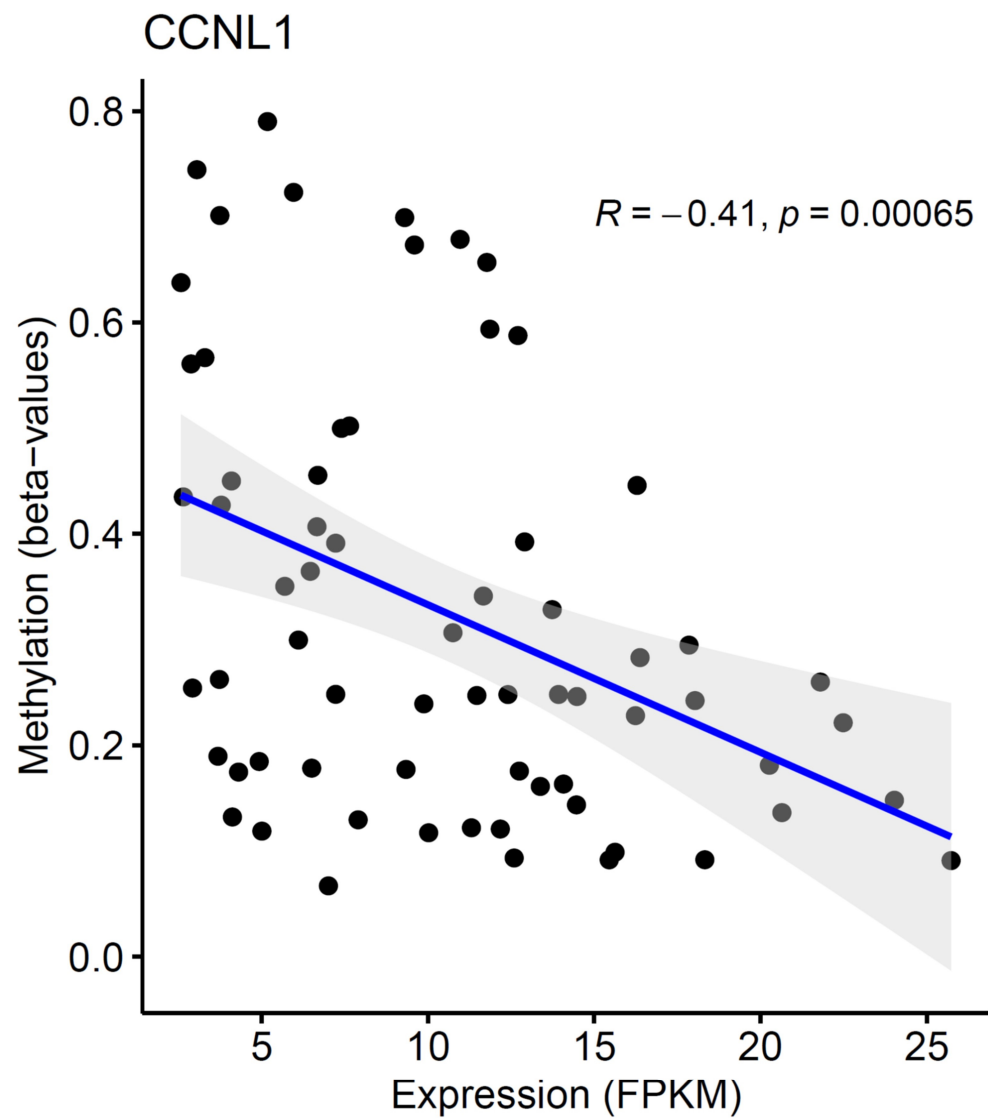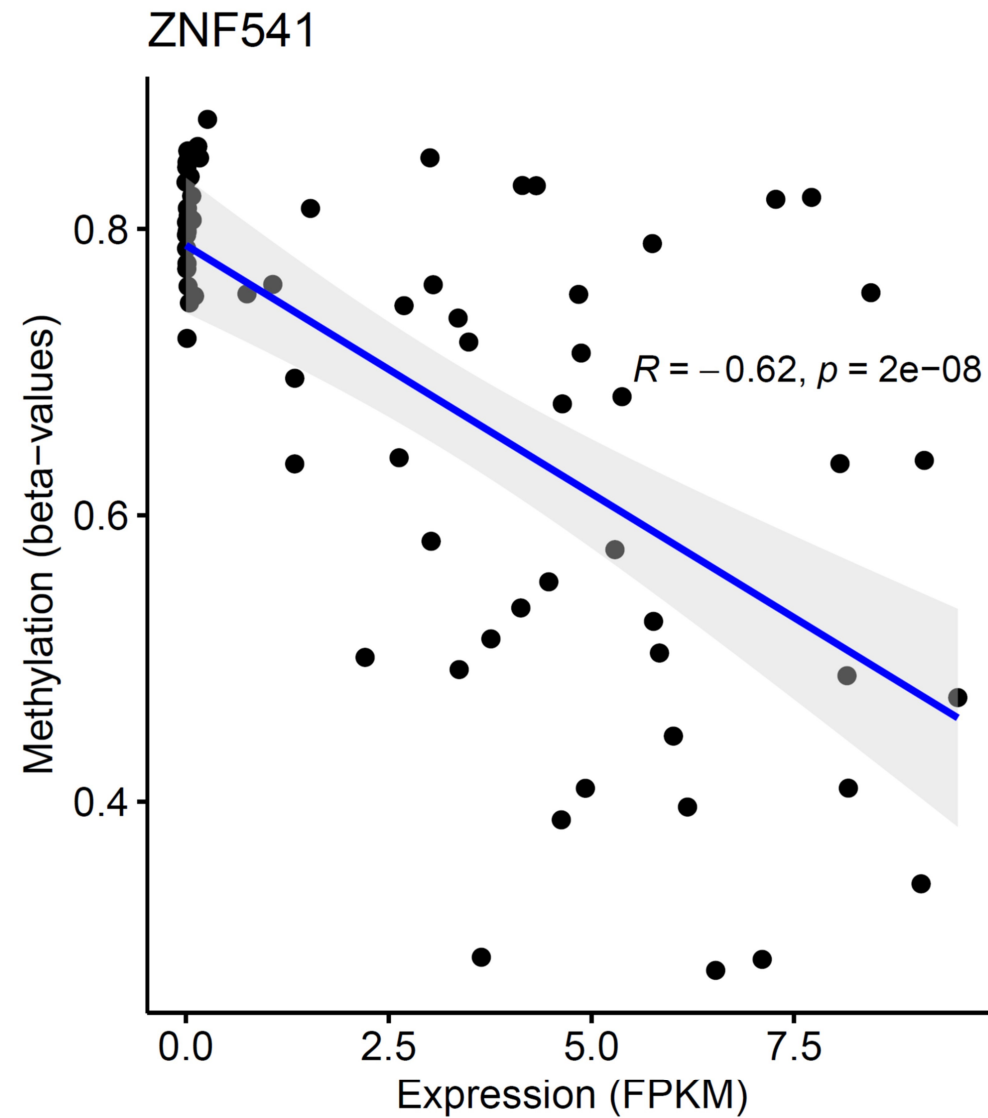

Supplement: s1 [file s1]

# All TEs in TSS - Methylation

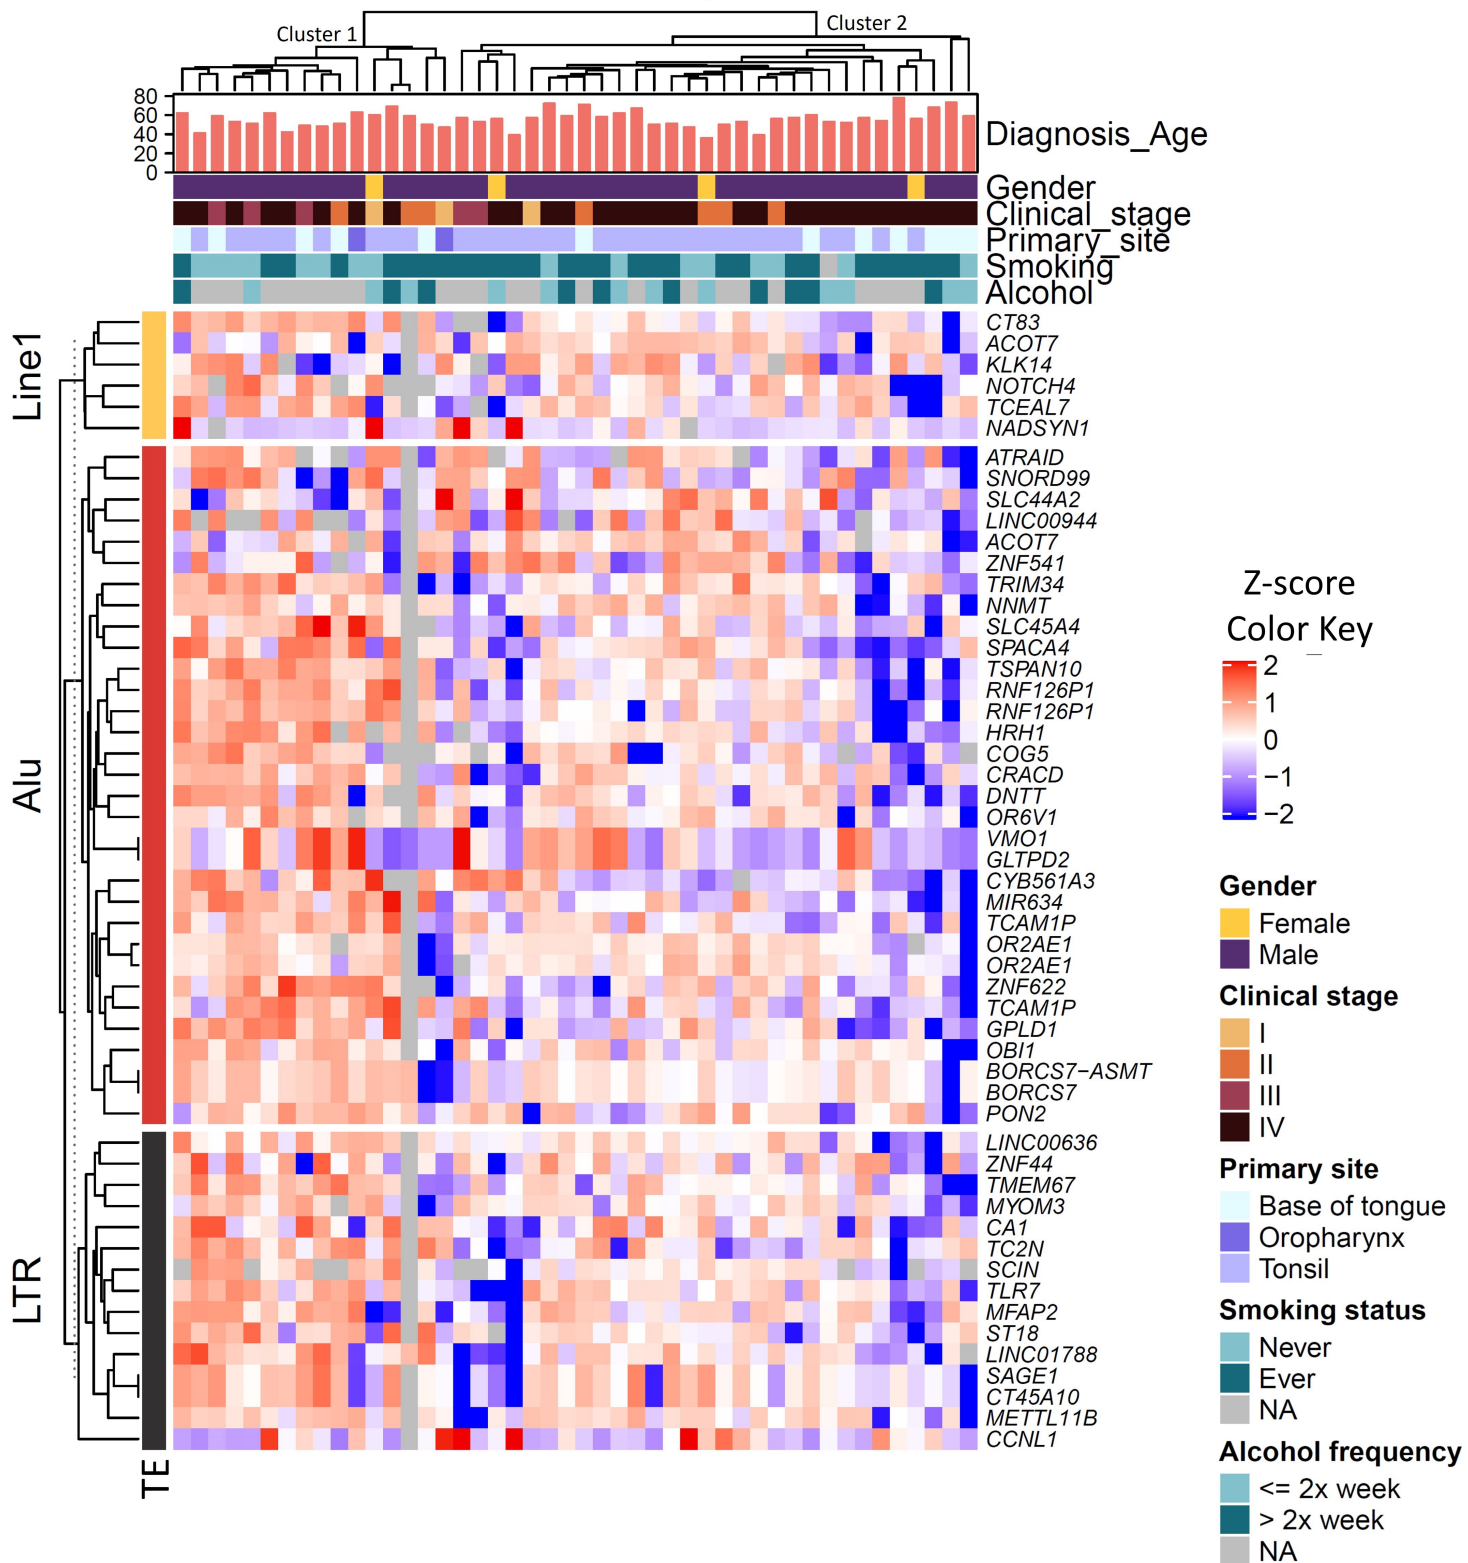

Supplement: s1 [file s1]

# 5-CpG methylation signature

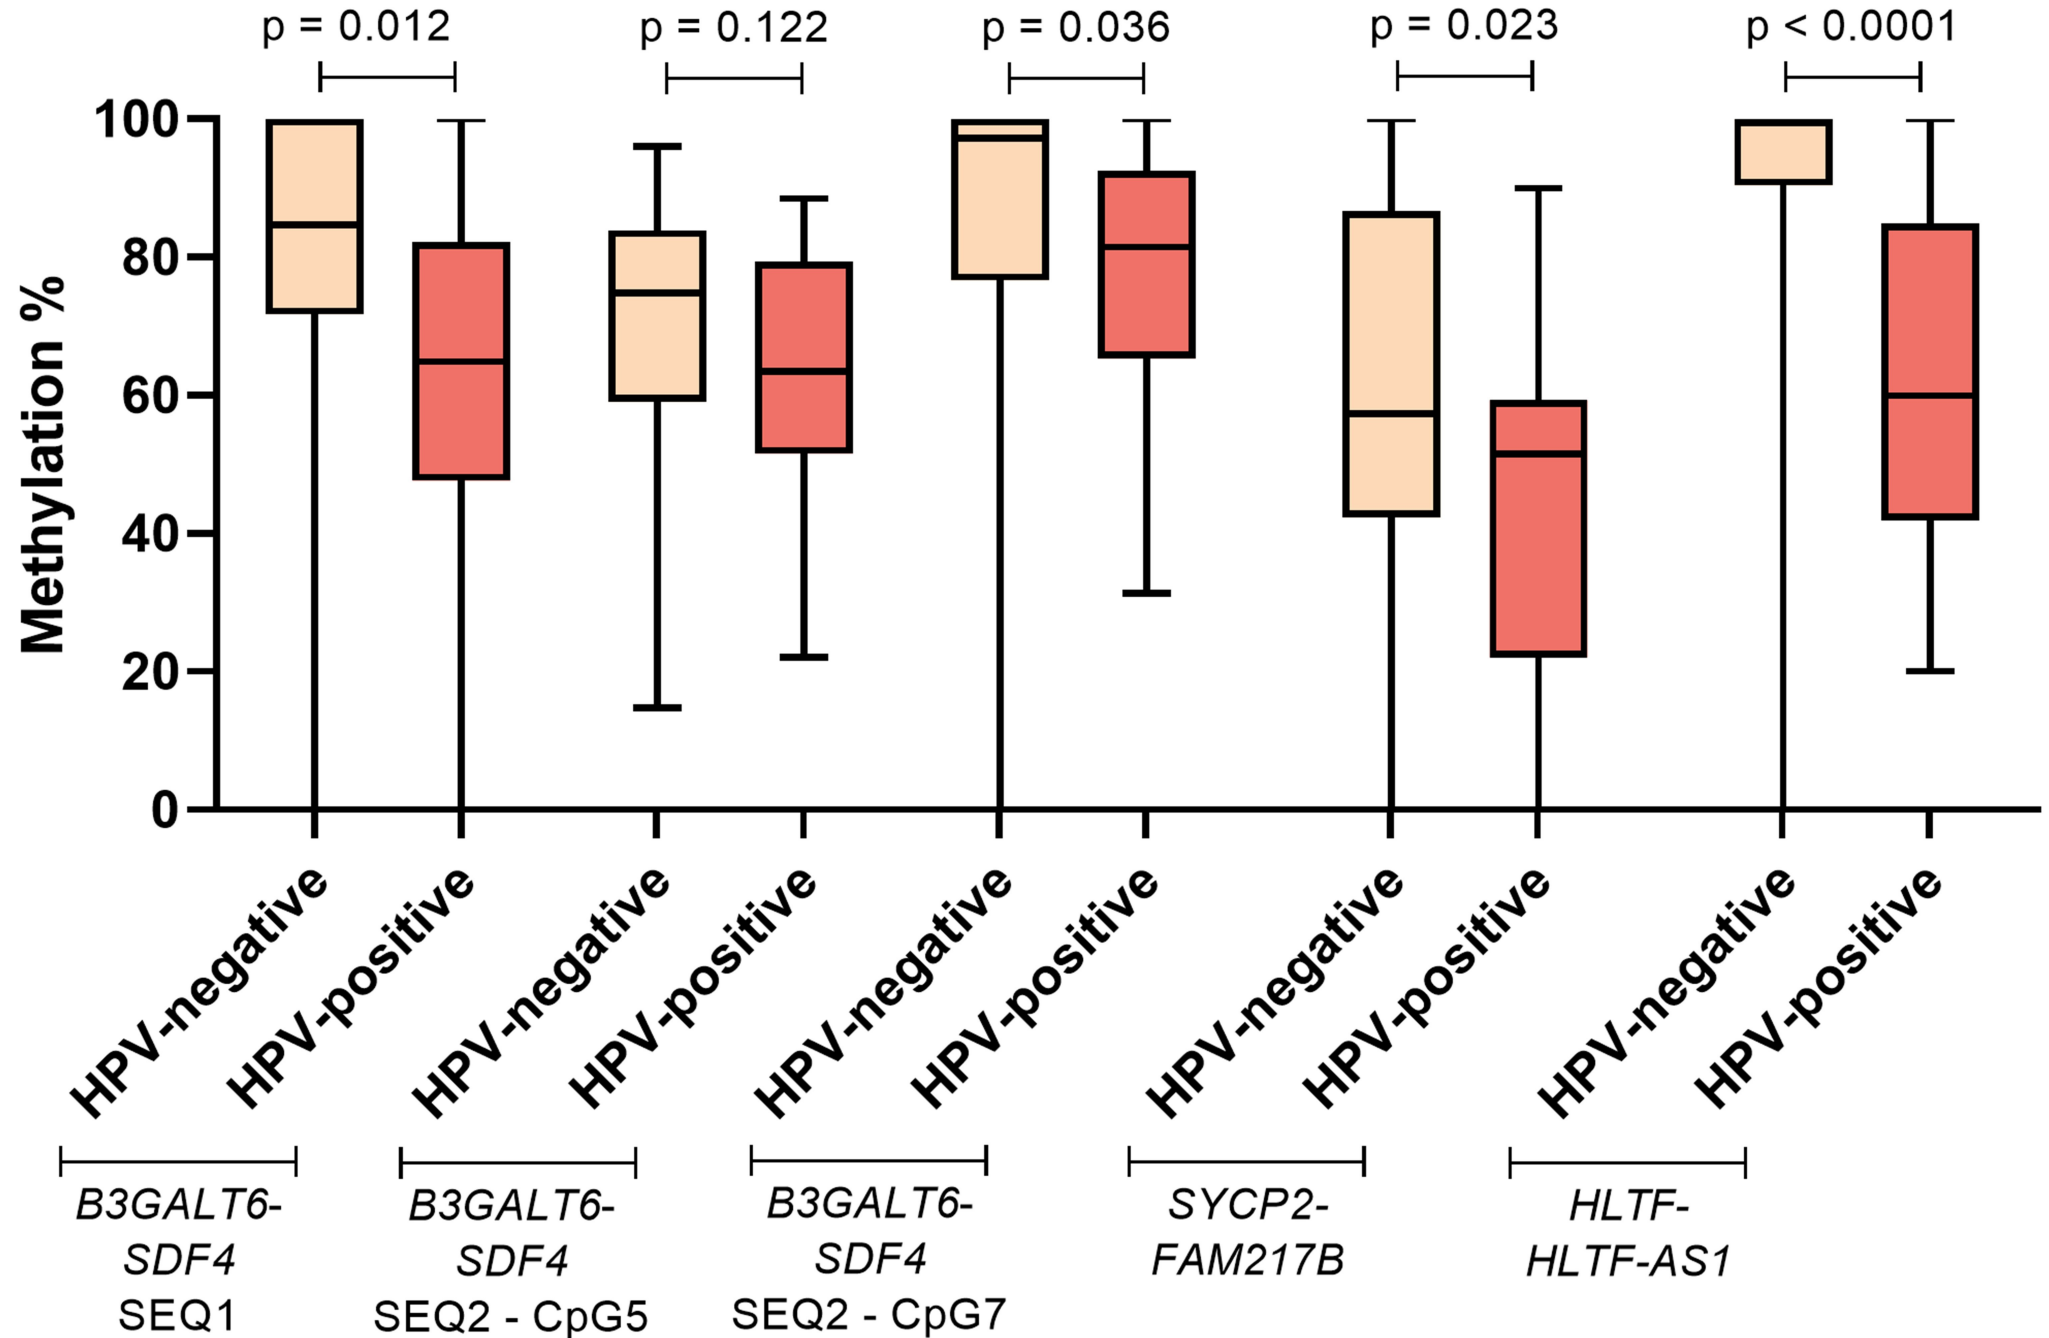

Supplement: s1 [file s1]

## OS according to LINE1 methylation (median)

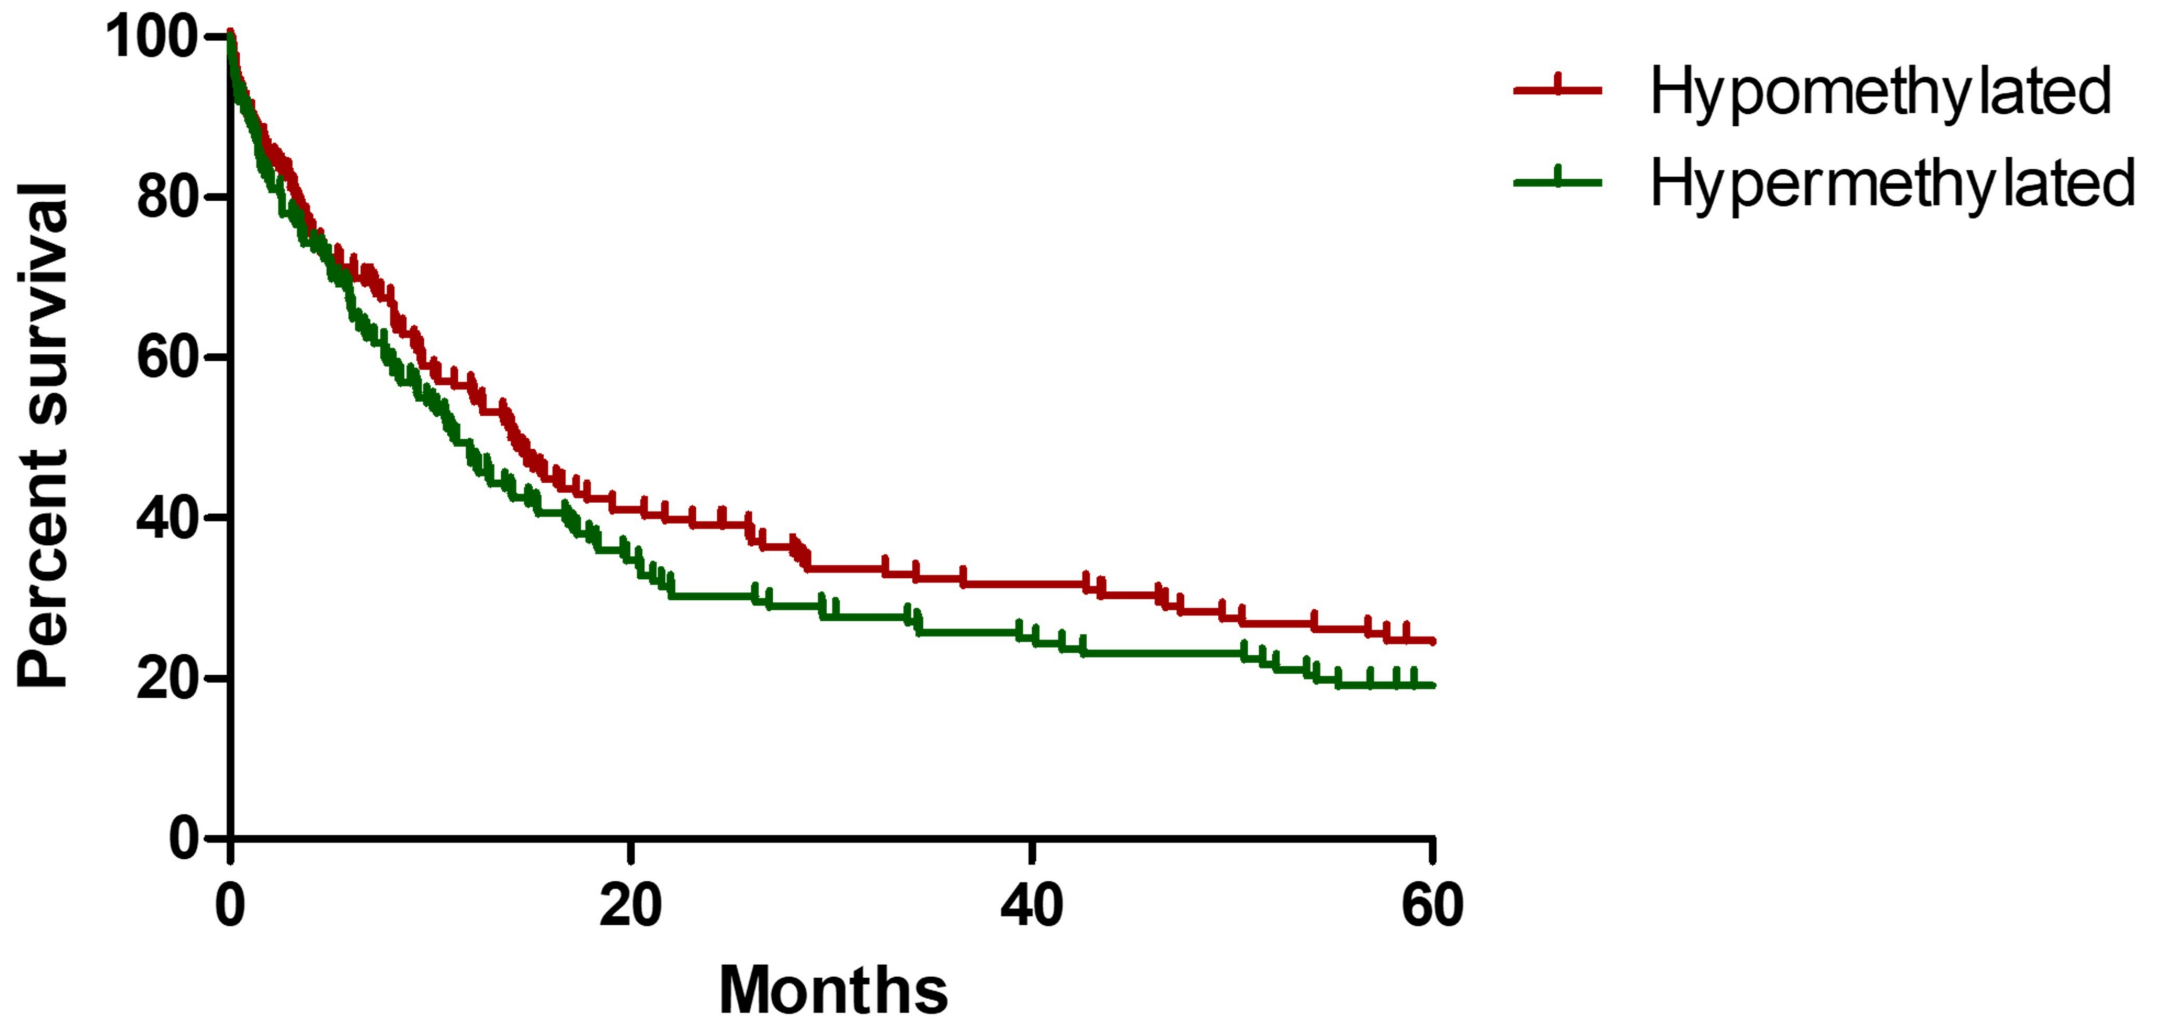

Supplement: s1 [file s1]
